# Supplementary material
Source: MDPI journal article supplement (https://www.mdpi.com/2075-1702/12/1/52)

Supplementary Material: Prototype's exploded-view drawing  
Universal Jamming Gripper: Experimental Analysis on Envelope and Granular Materials

- 1 Screw-in air pressure connector
- 2 M12 nut
- 3 Grower washer
- 4 Plain Washer
- 5 Main body
- 6 Clamping body
- 7 M4 threaded insert (x3)
- 8 O-ring seal
- 9 M12 drilled bolt
- 10 O-ring seal
- 11 Bolt cover
- 12 Air filter
- 13 Air filter cover
- 14 M4 bolt (x3)
- 15 Envelope

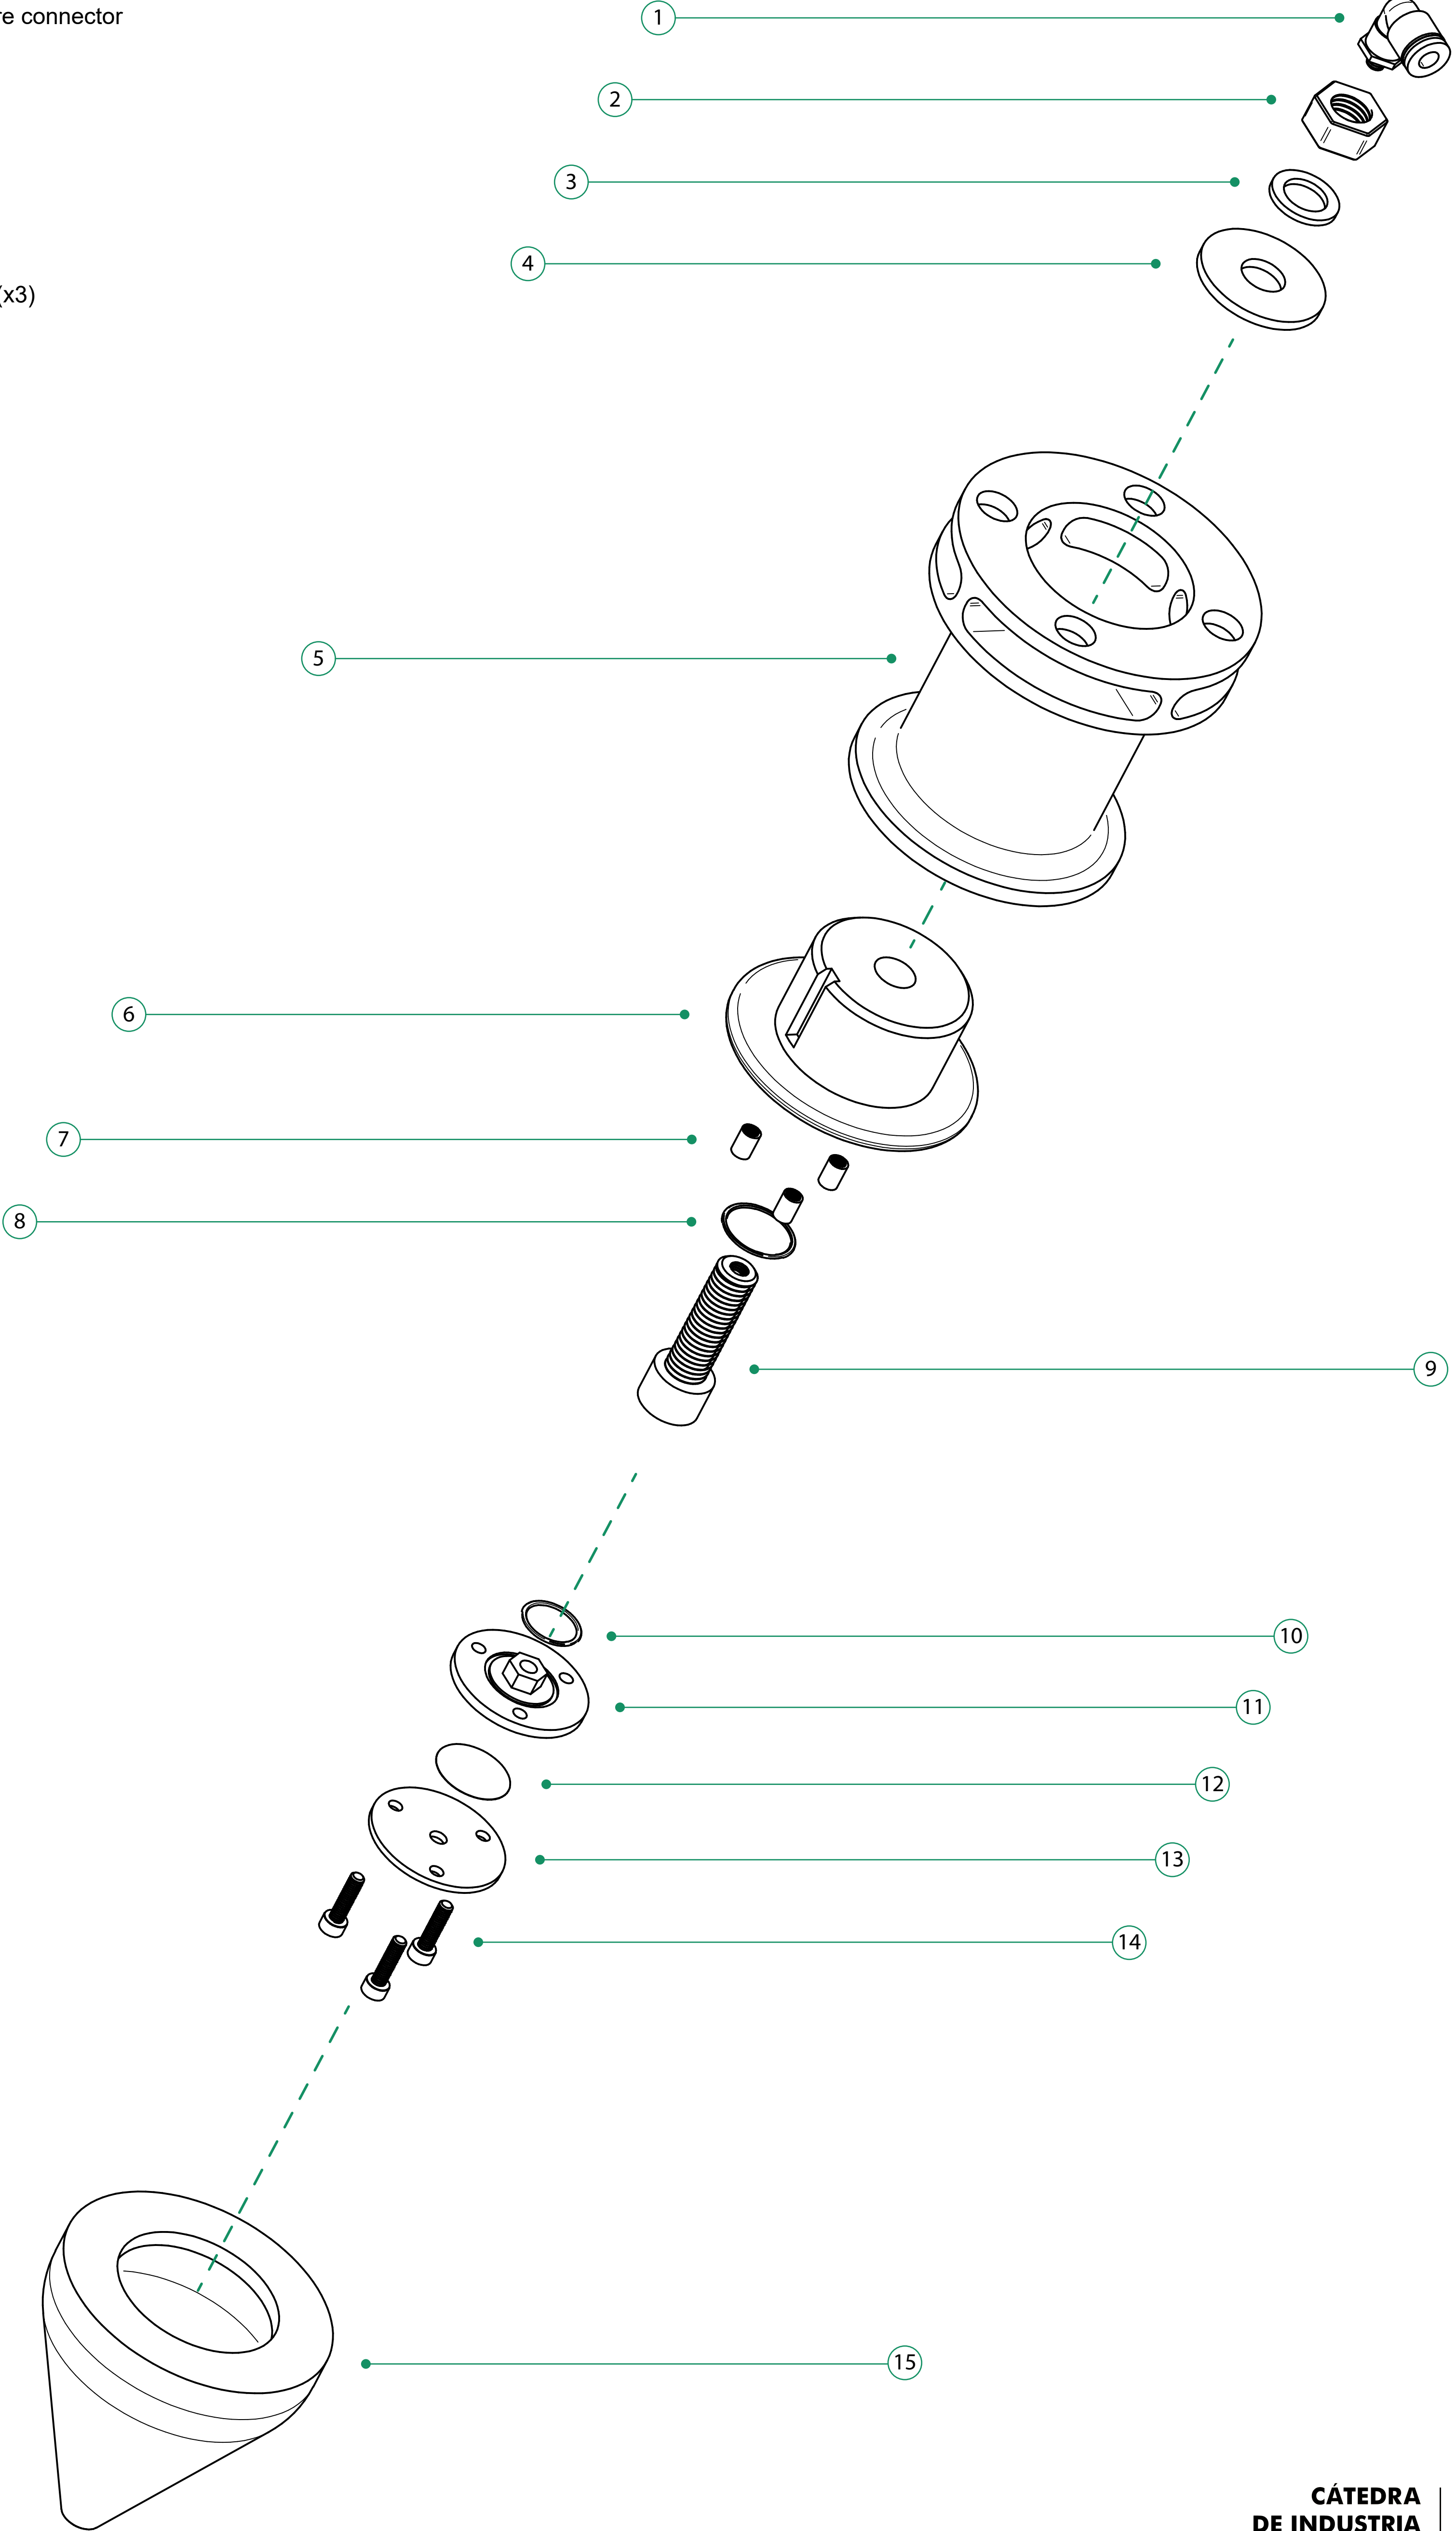

Supplement: s1 [file s1]
