# Supplementary material
Source: MDPI journal article supplement (https://www.mdpi.com/2075-1702/12/1/52)
Supplement: s1 [file s1]

Archive with 4 entries (4 files):
- Test30FPS.mp4
- PrototypeExplodedView.pdf
- ReadMe.txt
- Summary.txt
