# Supplementary material
Source: MDPI journal article supplement (https://www.mdpi.com/2075-1702/12/1/52)
Supplement: s1 [file s1 › ReadMe.txt]

Requirements:

- 'Test30FPS.mp4' can be played by simply using Microsoft Windows Media Player or similar.
- 'PrototypeExplodedView.pdf' can be displayed in any web browser i.e.: Chrome, Mozilla... 

In case any assistance is required or any question arises, please, send an email to iderodrigo@comillas.edu or allopez@comillas.edu
