# Supplementary material
Source: MDPI journal article supplement (https://www.mdpi.com/2075-1702/12/1/52)
Supplement: s1 [file s1 › Summary.txt]

This attaching '.zip' file contains two relevant files:

- One video ('Test30FPS.mp4'): The video shows the test process described on the methology section in the paper.

- One technical drawing ('PrototypeExplodedView.pdf'): The exploded view of the prototype, gathering all elements needed in the assembly.
